# Supplementary material
Source: publisher figshare collection journal article supplement (https://gsapubs.figshare.com/ndownloader/files/23300768)
Supplement: Supplementary file 1 [file 23300768]

## Sheet: Sheet1
Analytical spot	U (ppm)	Th (ppm)	U/Th	207Pb/206Pb	2SE	206Pb/238U	2SE	207Pb/235U	2SE	206Pb-238U age (Ma)	±	207Pb-235U age (Ma)	±
11AM07F-1	176	257	0.684825	0.0686	0.0033	0.00788	0.00019	0.0728	0.0035	50.6	1.2	71.1	3.3
11AM07F-2	159	133	1.19549	0.0572	0.0024	0.02255	0.00048	0.1748	0.0079	143.7	3	163.6	7
11AM07F-3	145	114	1.27193	0.0523	0.0028	0.01007	0.00023	0.0715	0.004	64.6	1.5	69.9	3.8
11AM07F-4	32	32	1	0.164	0.015	0.01782	0.00049	0.398	0.04	113.9	3.1	329	28
11AM07F-5	1063	75	14.1733	0.05119	0.00089	0.02396	0.00053	0.1659	0.0044	152.6	3.3	155.7	3.8
11AM07F-6	146	198	0.737374	0.0646	0.0027	0.01681	0.00037	0.148	0.0065	107.4	2.3	139.6	5.7
11AM07F-7	80	129	0.620155	0.097	0.0057	0.01556	0.00039	0.198	0.011	99.5	2.5	184	10
11AM07F-8	87	139	0.625899	0.1336	0.0073	0.01528	0.00042	0.282	0.017	97.8	2.7	249	13
11AM07F-9	137	252	0.543651	0.059	0.0024	0.0465	0.001	0.375	0.018	292.9	6.5	322	13
11AM07F-10	303	139	2.17986	0.06686	0.00094	0.1259	0.0024	1.14	0.023	764	14	772	11
11AM07F-11	48	74	0.648649	0.1136	0.0079	0.01164	0.00031	0.179	0.013	74.6	2	165	11
11AM07F-12	558	1471	0.379334	0.1071	0.005	0.00446	0.0001	0.0645	0.0029	28.67	0.65	63.3	2.8
11AM07F-13	635	304	2.08882	0.0642	0.0041	0.03853	0.00081	0.338	0.024	243.7	5.1	292	17
11AM07F-14	106	198	0.535354	0.0634	0.0046	0.00674	0.00018	0.0574	0.0043	43.3	1.1	56.4	4.1
11AM07F-15	210	330	0.636364	0.0517	0.0017	0.01865	0.00036	0.1314	0.0049	119.1	2.3	125.1	4.4
11AM07F-16	31	40	0.775	0.141	0.013	0.0186	0.00052	0.363	0.035	118.8	3.3	302	26
11AM07F-17	256	98	2.61224	0.056	0.0018	0.02414	0.00052	0.1845	0.0063	153.8	3.3	171.5	5.4
11AM07F-18	302	793	0.380832	0.0647	0.0019	0.02137	0.00041	0.1895	0.0065	136.3	2.6	175.7	5.5
11AM07F-19	182	88	2.06818	0.0846	0.0081	0.02713	0.00079	0.342	0.049	172.5	4.9	277	23
11AM07F-20	83	141	0.588652	0.0591	0.0055	0.00868	0.00022	0.0701	0.0062	55.7	1.4	68.2	5.8
11AM07F-21	211	240	0.879167	0.0603	0.0027	0.01463	0.00031	0.1223	0.0058	93.6	2	116.7	5.3
11AM07F-22	85	44	1.93182	0.074	0.0035	0.02679	0.00056	0.273	0.013	170.4	3.5	244	10
11AM07F-23	341	188	1.81383	0.0686	0.0028	0.01398	0.00031	0.133	0.006	89.5	1.9	126.3	5.4
11AM07F-24	30	117	0.25641	0.0714	0.0024	0.1232	0.0033	1.216	0.047	748	19	801	22
11AM07F-25	54	75	0.72	0.1068	0.0077	0.01176	0.00043	0.171	0.012	75.4	2.8	158	11
11AM07F-26	968	580	1.66897	0.0543	0.0018	0.00606	0.00016	0.0457	0.0018	38.9	1	45.3	1.8
11AM07F-27	413	293	1.40956	0.0597	0.0079	0.00634	0.00015	0.0505	0.0054	40.72	0.98	49.6	4.9
11AM07F-28	111	149	0.744966	0.0607	0.0016	0.0824	0.0016	0.693	0.021	510.6	9.5	535	12
11AM07F-29	489	343	1.42566	0.0585	0.0013	0.0729	0.0015	0.587	0.015	453.3	9.3	468.7	9.6
11AM07F-30	67	16	4.1875	0.0665	0.0022	0.1117	0.003	1.03	0.041	682	18	716	21
11AM07F-31	4	4	1	0.206	0.035	0.0496	0.0035	1.41	0.26	312	22	850	110
11AM07F-32	410	227	1.80617	0.0524	0.0013	0.02653	0.0005	0.1907	0.0053	168.8	3.1	177	4.6
11AM07F-33	166	145	1.14483	0.0608	0.0014	0.0789	0.0016	0.659	0.019	489.5	9.8	512	12
11AM07F-34	16	51	0.313725	0.0952	0.0073	0.0377	0.0013	0.48	0.037	238.7	8	386	25
11AM07F-35	122	146	0.835616	0.0834	0.0058	0.0078	0.00021	0.087	0.0062	50.1	1.3	84.1	5.7
11AM07F-36	322	545	0.590826	0.05308	0.00099	0.054	0.0011	0.3914	0.0095	339	6.5	335.5	7.1
11AM07F-37	27	12	2.25	0.1149	0.0035	0.3111	0.007	4.85	0.15	1745	34	1789	26
11AM07F-38	105	93	1.12903	0.0799	0.0055	0.0077	0.00024	0.0841	0.0061	49.4	1.6	81.4	5.7
11AM07F-39	659	482	1.36722	0.0514	0.0018	0.00636	0.00014	0.0443	0.0017	40.84	0.87	44.1	1.7
11AM07F-40	407	104	3.91346	0.0623	0.001	0.1114	0.0021	0.943	0.021	681	12	674	11
11AM07F-41	413	133	3.10526	0.0622	0.0018	0.0717	0.0017	0.603	0.019	446	10	478	12
11AM07F-42	687	426	1.61268	0.0532	0.0014	0.01231	0.00028	0.0889	0.0028	78.8	1.8	86.4	2.7
11AM07F-43	84	71	1.1831	0.0855	0.002	0.1941	0.0045	2.244	0.07	1143	24	1192	22
11AM07F-44	50	44	1.13636	0.0648	0.0072	0.0288	0.0023	0.242	0.035	180	13	212	26
11AM07F-45	342	907	0.377067	0.0532	0.0019	0.01177	0.00022	0.0846	0.0032	75.4	1.4	82.4	3
11AM07F-46	1204	1677	0.717949	0.0552	0.0016	0.00705	0.00016	0.0529	0.002	45.3	1	52.3	2
11AM07F-47	312	422	0.739336	0.0494	0.0014	0.02084	0.00041	0.1398	0.0048	132.9	2.6	132.6	4.2
11AM07F-48	67	123	0.544715	0.099	0.0066	0.01675	0.00049	0.22	0.017	107.1	3.1	202	14
11AM07F-49	16	23	0.695652	0.129	0.013	0.01744	0.00088	0.297	0.03	111.4	5.6	256	23
11AM07F-50	209	246	0.849593	0.0535	0.0021	0.01607	0.00032	0.1192	0.005	102.7	2	114.1	4.6
11AM07F-51	112	178	0.629213	0.0673	0.0032	0.01644	0.00047	0.1542	0.0086	105.1	3	145.4	7.7
11AM07F-52	265	294	0.901361	0.0781	0.0013	0.1773	0.0036	1.935	0.045	1052	20	1092	15
11AM07F-53	20	31	0.645161	0.204	0.024	0.00678	0.00053	0.189	0.029	43.6	3.4	169	22
11AM07F-54	407	366	1.11202	0.0513	0.0013	0.0187	0.00035	0.1345	0.0042	119.4	2.2	128.4	3.8
11AM07F-55	73	72	1.01389	0.0665	0.0035	0.02413	0.00057	0.222	0.012	153.7	3.6	201.6	9.7
11AM07F-57	95	128	0.742188	0.1368	0.0099	0.00927	0.00031	0.182	0.015	59.5	2	167	13
11AM07F-58	17	31	0.548387	0.248	0.019	0.01067	0.0005	0.358	0.028	68.4	3.2	305	21
11AM07F-59	7	7	1	0.263	0.032	0.0219	0.0019	0.89	0.17	139	12	575	78
11AM07F-60	26	38	0.684211	0.185	0.015	0.01145	0.00043	0.316	0.027	73.4	2.7	274	21
11AM07F-61	201	210	0.957143	0.06	0.0038	0.00587	0.00014	0.0501	0.0033	37.76	0.89	49.5	3.2
11AM07F-62	24	47	0.510638	0.0956	0.0092	0.01383	0.00054	0.188	0.019	88.5	3.4	171	16
11AM07F-63	113	243	0.465021	0.0706	0.007	0.01383	0.00034	0.143	0.017	88.6	2.2	132	14
11AM07F-64	203	208	0.975962	0.0533	0.0016	0.02481	0.00048	0.1884	0.006	158	3	174.9	5.1
11AM07F-65	353	662	0.533233	0.0568	0.002	0.01571	0.00034	0.1262	0.0049	100.5	2.1	120.9	4.5
11AM07F-66	87	278	0.31295	0.0951	0.009	0.00919	0.00023	0.13	0.014	59	1.5	121	12
11AM07F-67	264	166	1.59036	0.0538	0.0017	0.02315	0.00045	0.1777	0.0062	147.5	2.8	165.7	5.2
11AM07F-68	193	332	0.581325	0.0652	0.0019	0.0818	0.0019	0.765	0.028	507	11	576	16
11AM07F-69	325	231	1.40693	0.1103	0.0033	0.0351	0.0017	0.569	0.038	222	11	446	25
11AM07F-70	103	114	0.903509	0.0953	0.0074	0.00664	0.00017	0.0896	0.0072	42.7	1.1	86.3	6.6
11AM07F-71	146	216	0.675926	0.0552	0.0034	0.00681	0.00016	0.0531	0.0034	43.7	1	52.4	3.3
11AM07F-72	244	161	1.51553	0.0598	0.0025	0.00865	0.00019	0.0729	0.0031	55.5	1.2	71.3	2.9
11AM07F-73	96	205	0.468293	0.1035	0.0081	0.00647	0.00017	0.0944	0.0074	41.6	1.1	90.7	6.8
11AM07F-74	173	291	0.594502	0.0595	0.0039	0.00593	0.00014	0.0496	0.0033	38.14	0.9	49.7	3.3
11AM07F-75	129	41	3.14634	0.056	0.0021	0.02509	0.00052	0.1992	0.0079	159.7	3.3	183.8	6.7
11AM07F-76	121	201	0.60199	0.0662	0.0045	0.00663	0.00017	0.0617	0.0043	42.6	1.1	60.5	4
11AM07F-77	120	194	0.618557	0.0695	0.0038	0.01153	0.00024	0.1122	0.0064	73.9	1.5	107.4	5.8
11AM07F-78	230	260	0.884615	0.0531	0.0015	0.03456	0.0007	0.2587	0.0076	219	4.4	233.1	6.2
11AM07F-79	89	122	0.729508	0.0639	0.0032	0.02136	0.00046	0.1899	0.0093	136.2	2.9	176.4	8.1
11AM07F-80	133	277	0.480144	0.0506	0.0017	0.03501	0.00068	0.2476	0.0091	221.8	4.2	224.6	7.2
11AM07F-81	681	989	0.688574	0.0498	0.0016	0.00633	0.00012	0.0436	0.0015	40.7	0.78	43.3	1.5
11AM07F-82	65	130	0.5	0.103	0.0073	0.00926	0.00029	0.132	0.011	59.4	1.9	124.4	9.5
11AM07F-83	241	192	1.25521	0.0631	0.0024	0.01536	0.00033	0.1328	0.0057	98.3	2.1	126.2	5.1
11AM07F-84	217	334	0.649701	0.0643	0.0037	0.00599	0.00015	0.0531	0.0036	38.52	0.97	52.3	3.4
11AM07F-85	489	864	0.565972	0.114	0.019	0.00933	0.00036	0.151	0.036	59.8	2.3	129	25
11AM07F-86	188	252	0.746032	0.0651	0.0036	0.00773	0.00017	0.0677	0.0037	49.7	1.1	66.3	3.6
11AM07F-87	114	253	0.450593	0.0522	0.002	0.03143	0.00069	0.2221	0.0096	199.5	4.3	203.6	8.1
11AM07F-88	305	376	0.81117	0.0555	0.0028	0.00655	0.00014	0.0493	0.0026	42.08	0.88	48.7	2.5
11AM07F-89	32	31	1.03226	0.0955	0.0035	0.1721	0.0051	2.225	0.092	1023	28	1185	29
11AM07F-90	174	201	0.865672	0.0596	0.0027	0.02153	0.00073	0.1734	0.0075	137.3	4.6	162.4	6.6
11AM07F-91	186	194	0.958763	0.0593	0.0035	0.00989	0.00023	0.0786	0.005	63.4	1.5	76.4	4.6
11AM07F-92	272	186	1.46237	0.0617	0.002	0.02434	0.0005	0.202	0.0066	155	3.2	186.4	5.5
11AM07F-93	241	165	1.46061	0.0736	0.0015	0.1213	0.0027	1.203	0.033	738	15	801	15
11AM07F-94	21	45	0.466667	0.164	0.023	0.01501	0.0009	0.294	0.03	96	5.7	254	23
11AM07F-95	103	267	0.385768	0.0611	0.0028	0.01689	0.00039	0.1384	0.0066	108	2.5	131	5.9
11AM07F-96	437	926	0.471922	0.0499	0.0021	0.00741	0.00015	0.0499	0.0022	47.61	0.97	49.4	2.1
11AM07F-97	158	122	1.29508	0.0565	0.0021	0.068	0.0015	0.518	0.02	424.2	8.9	423	13
11AM07F-98	163	192	0.848958	0.0656	0.0046	0.00626	0.00015	0.0539	0.0035	40.25	0.99	53.1	3.4
11AM07F-99	586	1336	0.438623	0.0699	0.0028	0.00643	0.00013	0.0605	0.0027	41.3	0.81	59.6	2.6
11AM07F-100	103	173	0.595376	0.0677	0.005	0.00791	0.0002	0.073	0.0059	50.8	1.3	71	5.5
11AM07F-101	609	188	3.23936	0.1234	0.002	0.2026	0.0041	3.371	0.08	1189	22	1496	19
11AM07F-102	296	586	0.505119	0.0552	0.0017	0.0255	0.00051	0.1887	0.0063	162.3	3.2	175.1	5.4
11AM07F-103	186	330	0.563636	0.0797	0.0034	0.01709	0.00034	0.1856	0.0085	109.3	2.1	172	7.2
11AM07F-104	69	53	1.30189	0.0647	0.0031	0.0969	0.0024	0.843	0.041	596	14	618	22
11AM07F-105	194	334	0.580838	0.0574	0.0025	0.01452	0.00032	0.1124	0.0052	92.9	2	107.8	4.7
11AM07F-106	194	616	0.314935	0.0585	0.0041	0.00663	0.00016	0.0527	0.0039	42.6	1	51.9	3.7
11AM07F-107	371	471	0.787686	0.053	0.0022	0.01372	0.00026	0.0987	0.0045	87.8	1.7	95.2	4.2
11AM07F-108	262	334	0.784431	0.0531	0.0025	0.01144	0.00023	0.0821	0.0039	73.3	1.5	79.9	3.7
11AM07F-109	132	113	1.16814	0.0757	0.0035	0.01768	0.0004	0.1816	0.0085	113	2.5	169.5	7.4
11AM07F-110	71	179	0.396648	0.1487	0.0028	0.3591	0.0082	7.29	0.21	1980	38	2152	24
11AM07F-111	72	40	1.8	0.096	0.011	0.00836	0.00042	0.112	0.018	53.6	2.7	100	13
11AM07F-112	359	159	2.25786	0.0523	0.0024	0.00637	0.00015	0.046	0.0023	40.93	0.98	45.6	2.2
11AM07F-113	124	213	0.58216	0.0636	0.0039	0.00753	0.00019	0.0656	0.0039	48.3	1.2	64.2	3.7
11AM07F-114	223	78	2.85897	0.0559	0.0018	0.0234	0.00048	0.1819	0.0064	149.1	3	169.2	5.5
11AM07F-115	129	99	1.30303	0.1233	0.0022	0.3222	0.0066	5.51	0.12	1800	32	1902	19
11AM07F-116	535	497	1.07646	0.0832	0.0061	0.00676	0.00015	0.0778	0.0066	43.42	0.96	75.4	6
11AM07F-117	51	81	0.62963	0.0857	0.0041	0.03071	0.00076	0.37	0.02	194.9	4.7	316	15
11AM07F-118	408	252	1.61905	0.0799	0.0037	0.0289	0.0024	0.362	0.041	183	15	297	30
11AM07F-119	50	45	1.11111	0.1166	0.0031	0.1857	0.0047	3.02	0.12	1097	26	1408	29
11AM07F-120	21	51	0.411765	0.174	0.033	0.00846	0.00069	0.173	0.031	54.2	4.4	152	24
11AM07F-121	36	72	0.5	0.0957	0.0098	0.0608	0.002	0.832	0.091	380	12	600	48
11AM07F-122	137	170	0.805882	0.0611	0.0021	0.02203	0.00046	0.1883	0.0072	140.5	2.9	174.6	6.1
11AM07F-123	306	416	0.735577	0.0556	0.0021	0.01346	0.00028	0.1061	0.0043	86.2	1.8	102.2	4
11AM07F-124	39	92	0.423913	0.0712	0.0092	0.00647	0.00027	0.061	0.0076	41.5	1.7	59.1	7.2
11AM07F-125	147	92	1.59783	0.0524	0.0026	0.01316	0.00031	0.0959	0.0049	84.3	2	92.7	4.5
11AM07F-126	51	114	0.447368	0.173	0.018	0.01135	0.00037	0.284	0.034	72.7	2.4	248	26
11AM07F-127	370	204	1.81373	0.0567	0.0011	0.0641	0.0012	0.506	0.012	400.7	7.4	415.4	8.2
11AM07F-128	97	94	1.03191	0.0678	0.0044	0.01418	0.00034	0.1361	0.0097	90.7	2.2	128.2	8.6
11AM07F-129	264	292	0.90411	0.073	0.0025	0.01377	0.00027	0.1399	0.0052	88.2	1.7	132.7	4.6
11AM07F-130	325	220	1.47727	0.0527	0.0016	0.01639	0.00032	0.1204	0.0043	104.8	2	115.2	3.9
11AM07F-131	170	163	1.04294	0.0534	0.0024	0.01576	0.00033	0.117	0.0059	100.8	2.1	111.9	5.3
11AM07F-132	184	125	1.472	0.0569	0.0017	0.03757	0.00091	0.3	0.0099	237.7	5.6	266.4	7.6
11AM07F-133	107	146	0.732877	0.0576	0.0033	0.01641	0.00034	0.1326	0.0081	104.9	2.2	125.5	7.2
11AM07F-134	99	141	0.702128	0.1204	0.0096	0.00973	0.00027	0.168	0.015	62.4	1.7	155	13
11AM07F-135	85	88	0.965909	0.0874	0.0069	0.00815	0.00026	0.102	0.01	52.3	1.7	97.1	9.1
11AM07F-136	314	144	2.18056	0.0493	0.0012	0.02536	0.00056	0.1731	0.0054	161.4	3.5	162.3	4.8
11AM07F-137	170	142	1.19718	0.0604	0.0025	0.0196	0.0011	0.1599	0.0091	124.7	6.8	149.5	7.9
11AM07F-138	121	224	0.540179	0.0729	0.0066	0.0056	0.00014	0.0562	0.0051	36.01	0.9	55.1	4.8
11AM07F-139	1122	150	7.48	0.0506	0.00087	0.02429	0.00051	0.1697	0.0038	154.7	3.2	159	3.3
11AM07F-140	664	512	1.29688	0.0508	0.0018	0.00604	0.00013	0.0424	0.0017	38.85	0.85	42.1	1.6
11AM07F-141	526	805	0.653416	0.0652	0.0012	0.0653	0.0013	0.588	0.014	408	8.1	469.9	9.2
11AM07F-142	361	547	0.659963	0.0568	0.0015	0.01895	0.00036	0.1488	0.0045	121	2.3	140.7	4
11AM07F-143	151	163	0.92638	0.069	0.0033	0.01066	0.00022	0.1013	0.0052	68.4	1.4	97.6	4.8
11AM07F-144	124	205	0.604878	0.098	0.01	0.00582	0.00015	0.0784	0.0087	37.41	0.96	76.5	8.1
11AM07F-145	374	139	2.69065	0.1262	0.0018	0.3471	0.0067	6.02	0.12	1920	32	1978	18
11AM07F-146	90	126	0.714286	0.0685	0.0073	0.00384	0.00011	0.0357	0.0039	24.71	0.73	35.3	3.8
11AM07F-147	155	279	0.555556	0.1471	0.006	0.00828	0.00021	0.1682	0.008	53.1	1.3	157.1	6.9
11AM07F-148	203	341	0.595308	0.0589	0.0023	0.01538	0.00031	0.1241	0.0053	98.4	2	118.4	4.8
11AM07F-149	166	141	1.1773	0.0589	0.0025	0.01969	0.00041	0.1585	0.008	125.7	2.6	148.6	6.9
11AM07F-150	85	71	1.19718	0.0776	0.0043	0.01687	0.00043	0.174	0.0099	107.9	2.7	162.9	8.9
11AM07F-151	103	21	4.90476	0.0551	0.0024	0.0235	0.00055	0.1781	0.0083	149.7	3.4	165.6	7.1
11AM07F-152	31	58	0.534483	0.0872	0.0072	0.01773	0.00062	0.21	0.016	113.2	4	191	13
11AM07F-153	45	90	0.5	0.0747	0.0072	0.01059	0.00035	0.1004	0.0098	67.9	2.2	97.2	9.3
11AM07F-154	199	129	1.54264	0.0577	0.0025	0.01368	0.00028	0.1073	0.0045	87.6	1.8	103.2	4.1
11AM07F-155	91	104	0.875	0.0583	0.0027	0.02472	0.00055	0.197	0.01	157.4	3.4	181.4	8.7
11AM07F-156	48	53	0.90566	0.164	0.018	0.00388	0.00016	0.083	0.0089	25	1	79.7	8.2
11AM07F-157	56	95	0.589474	0.0832	0.007	0.01162	0.00036	0.135	0.013	74.4	2.3	127	12
11AM07F-158	249	356	0.699438	0.0833	0.0064	0.00893	0.00021	0.0991	0.0085	57.3	1.3	95	7.5
11AM07F-159	82	158	0.518987	0.143	0.016	0.00728	0.00022	0.149	0.018	46.8	1.4	136	16
11AM07F-160	70	93	0.752688	0.114	0.011	0.00647	0.0002	0.103	0.011	41.6	1.3	98	10
11AM07F-161	177	134	1.3209	0.1668	0.0051	0.2072	0.0047	4.69	0.19	1213	25	1760	33
11AM07F-162	113	147	0.768707	0.0753	0.0072	0.01238	0.00034	0.13	0.016	79.3	2.2	123	13
11AM07F-163	166	162	1.02469	0.0612	0.0017	0.0671	0.0014	0.557	0.017	418.6	8.3	449	11
11AM07F-164	482	837	0.575866	0.0516	0.0017	0.01196	0.00023	0.0834	0.0031	76.6	1.5	81.2	2.9
11AM07F-165	73	100	0.73	0.0827	0.0018	0.1946	0.0038	2.17	0.054	1146	20	1169	17
11AM07F-166	62	63	0.984127	0.115	0.018	0.0325	0.001	0.57	0.12	206.4	6.2	390	53
11AM07F-167	755	691	1.09262	0.053	0.0019	0.0064	0.00013	0.0456	0.0017	41.09	0.81	45.3	1.6
11AM07F-168	162	187	0.86631	0.0689	0.002	0.04628	0.00092	0.432	0.014	291.6	5.7	364.5	9.5
11AM07F-169	298	121	2.46281	0.0514	0.0013	0.02521	0.00048	0.1759	0.005	160.5	3	164.3	4.4
11AM07F-170	434	496	0.875	0.0573	0.0024	0.03336	0.00067	0.261	0.012	211.5	4.2	233.8	9
11AM07F-171	195	292	0.667808	0.0623	0.0039	0.00794	0.00018	0.0665	0.0042	51	1.2	65.1	4
11AM07F-172	169	176	0.960227	0.0589	0.0015	0.0647	0.0012	0.523	0.015	404.4	7.3	425.8	9.9
11AM07F-173	106	131	0.80916	0.0786	0.0062	0.00667	0.00017	0.071	0.006	42.8	1.1	69	5.5
11AM07F-174	486	107	4.54206	0.0495	0.0021	0.00594	0.00012	0.0408	0.0018	38.16	0.79	40.5	1.8
11AM07F-175	182	226	0.80531	0.0757	0.0042	0.01209	0.0003	0.1276	0.0075	77.5	1.9	121.1	6.7
11AM07F-176	18	20	0.9	0.402	0.035	0.0122	0.0013	0.76	0.13	78.2	8.1	512	61
11AM07F-178	137	165	0.830303	0.0697	0.0051	0.00652	0.00017	0.0639	0.0049	41.9	1.1	62.5	4.7
11AM07F-179	31	82	0.378049	0.175	0.012	0.01497	0.00071	0.361	0.027	95.7	4.5	306	19
11AM07F-180	9	40	0.225	0.0842	0.0072	0.1081	0.0036	1.28	0.1	661	21	829	46
11AM07F-181	55	59	0.932203	0.0802	0.0064	0.00768	0.00024	0.0851	0.0067	49.3	1.5	82.2	6.2
11AM07F-182	329	610	0.539344	0.0683	0.0017	0.1186	0.0026	1.14	0.033	722	15	771	16
11AM07F-183	91	227	0.400881	0.0788	0.0066	0.00822	0.00024	0.0896	0.0079	52.8	1.6	87.1	7.5
11AM07F-184	239	369	0.647696	0.0736	0.005	0.00761	0.00019	0.0782	0.0063	48.9	1.2	75.8	5.8
11AM07F-185	83	96	0.864583	0.0795	0.0058	0.01776	0.00045	0.194	0.015	113.5	2.8	181	14
11AM07F-186	88	104	0.846154	0.0825	0.0069	0.00792	0.00021	0.089	0.0075	50.9	1.4	85.7	6.8
11AM07F-187	231	146	1.58219	0.0596	0.0036	0.00661	0.00016	0.0562	0.0036	42.4	1	55.3	3.5
11AM07F-188	579	364	1.59066	0.0545	0.0017	0.01349	0.00031	0.104	0.004	86.3	2	100.3	3.6
11AM07F-189	293	278	1.05396	0.0522	0.0013	0.03501	0.00065	0.2568	0.0071	221.8	4.1	231.7	5.7
